# Supplementary material for: A novel catalyst of WO2 nanorod for the counter electrode of dye-sensitized solar cells
Source: Royal Society of Chemistry journal article supplement (doi:10.1039/c1cc10638d), 2011-01-01
Supplement: c1cc10638d.pdf [file c1cc10638d.pdf]

## Supplementary Information

### **A novel catalyst of WO<sub>2</sub> nanorod for the counter electrode of dye-sensitized solar cells**

Ming Xing Wu, Xiao Lin, Anders Hagfeldt and Ting Li Ma\*

#### **X-ray diffractograms peaks assignment of the synthesized WO<sub>2</sub> and WO<sub>3</sub>**

In Fig. 1a, the diffraction peaks of 18.4 °, 25.8 °, 31.6 °, 37.0 °, 41.4 °, 49.7 °, 53.0 °, 59.8 °, 63.3 °, 66.3 °, 72.7 °, 73.6 °, 78.5 °, 78.8 ° 80.9 ° and 84.0 ° are attributed to the planes of (101), (011), (101), (211), (210), (301), (220), (310), (321), (231), (411), (413), (004), (233), (041) and (033) for WO<sub>2</sub> (32-1393, PDF 2 database). And in Fig. 1b the diffraction peaks of 13.9 °, 23.2 °, 24.3 °, 26.8 °, 28.1 °, 33.9 °, 36.7 °, 39.3 °, 42.0 °, 44.6 °, 47.4 °, 48.9 °, 49.7 °, 53.5 °, 55.6 °, 58.1 °, 62.0 °, 67.2 °, 71.3 °, 76.1 ° and 83.2 ° are attribute to the planes of (100), (002), (110), (111), (200), (112), (202), (211), (300), (212), (004), (302), (220), (311), (222), (400), (214), (410), (224), (106) and (324) for WO<sub>3</sub> (85-2460, PDF 2 database).

#### **Preparation of WO<sub>2</sub>, WO<sub>3</sub>, and Pt electrodes**

200 mg of WO<sub>2</sub> or WO<sub>3</sub> powder and 4 g of zirconium dioxide pearl were dispersed in 3 mL isopropanol and milled for 4 hours. Then the obtained solution was sprayed on FTO glass (Asahi Glass, type-U, 14 Ω/□, Japan). The FTO glass was coated with WO<sub>2</sub> or WO<sub>3</sub> film and then sintered in a tube furnace in N<sub>2</sub> atmosphere at 500 °C for 30 min. Pt electrodes were prepared according to our previous work.<sup>1</sup>

#### **Photoanode preparation and cell fabrication**

A 12 μm thick layer of 20 nm-sized TiO<sub>2</sub> layer (P25, Degussa, Germany) was loaded on FTO glass by doctor-blading technique. After sintering at 200 °C, the obtained layer was further coated with a 4 μm thick scattering layer of 160 nm-sized TiO<sub>2</sub> (ST-41, Ishihara, Japan) followed by sintering at 500 °C. After cooling to 80 °C, the TiO<sub>2</sub> films were immersed in a 5 x 10<sup>-4</sup> M solution of N719 dye (Solaronix SA, Switzerland) in acetonitrile/*tert*-butyl alcohol (1:1 volume ration) for 14 h. The triiodide/iodide electrolyte contains 0.06 M of LiI, 0.6 M 1-butyl-3-methylimidazolium iodide, 0.03 M I<sub>2</sub>, 0.5 M 4-*tert*-butyl pyridine, and 0.1 M guanidinium thiocyanate in acetonitrile. A DSC was assembled by a photoanode, with a counter electrode sandwiching the electrolyte. A symmetrical cell was assembled with two identical WO<sub>2</sub>, WO<sub>3</sub>, and Pt electrodes sandwiching the

electrolyte. The two electrodes were sealed by double-faced insulated adhesive tapes. The DSCs were used for the photocurrent-voltage test with an effective area of  $0.2 \text{ cm}^2$ . The symmetrical cells with effective area of  $0.25 \text{ cm}^2$  were used in the Tafel-polarization test and the EIS experiments.

### Characterization

The X-ray diffraction experiment was carried out with an automatic X-Ray powder diffractometer (D/Max 2400, RIGAKU). The surface morphologies of  $\text{WO}_2$  and  $\text{WO}_3$  powder were characterized using SEM (FEI HITACHI S-4800). Cyclic voltammetry (CV) was carried out in a three-electrode system in an Ar-purged acetonitrile solution containing  $0.1 \text{ M LiClO}_4$ ,  $10 \text{ mM LiI}$ , and  $1 \text{ mM I}_2$  at a scan rate of  $100 \text{ mV s}^{-1}$  using a BAS 100B/W electrochemical analyzer. Pt worked as a counter electrode and  $\text{Ag/Ag}^+$  worked as a reference electrode. Photocurrent-voltage performance of the DSCs was conducted in simulated AM 1.5 illumination ( $I=100 \text{ mW cm}^{-2}$ , Solar Light Co., INC., USA) with a Keithley digital source meter (Keithley 2601, USA). The EIS experiment was conducted in the dark with dummy cells using a computer-controlled potentiostat (Zenium Zahner, Germany). The measured frequency ranged from  $100 \text{ m Hz}$  to  $1 \text{ M Hz}$ , and the AC amplitude was set at  $10 \text{ mV}$ . The spectra were fitted by Zview software. The equivalent circuit diagrams were shown in Fig. S1. Tafel-polarization measurements were carried out with an electrochemical workstation system (LK-9805, Tianjin Lanli Inc.) in a symmetrical dummy cell. The scan rate was  $50 \text{ mV s}^{-1}$ .

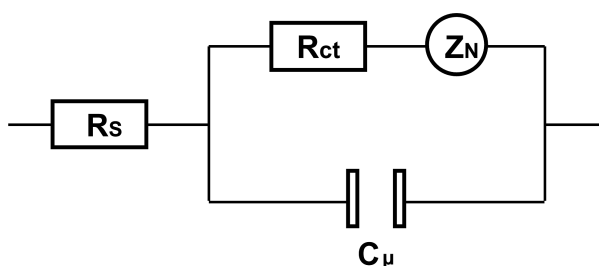

**Fig. S1** Equivalent circuit for fitting EIS plots.  $R_s$ : series resistance,  $R_{ct}$ : charge transfer resistance in the electrode/electrolyte interface,  $C_\mu$ : corresponding capacitance in the electrode/electrolyte interface,  $Z_N$ : Nernst diffusion resistance.

### References

- 1 X. M. Fang, T. L. Ma, G. Guan, M. Akiyama, E. Abe, *J. Photochem. Photobiol. A* 2004, **164**, 179.
